# Supplementary material for: Effects by periodontitis on pristane-induced arthritis in rats
Source: PubMed Central journal article supplement (PMC5094068; doi:10.1186/s12967-016-1067-6), 2016-11-03

**A**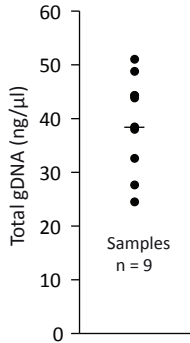**B**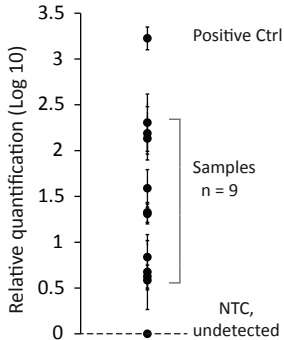

Supplement: 12967_2016_1067_MOESM1_ESM.pdf [file 12967_2016_1067_MOESM1_ESM.pdf]
